# Supplementary material for: The experience of mathematical beauty and its neural correlates
Source: Front Hum Neurosci. 2014 Feb 13;8:68. doi: 10.3389/fnhum.2014.00068 (PMC3923150; doi:10.3389/fnhum.2014.00068)
Supplement: Data Sheet 3 [file DataSheet3.XLSX]

## Sheet: New Text Document
Behavioural data
Sixteen subjects were recruited for the study (S01 to S16). Subject S08 was excluded as he was suffering from Attention Deficit Hyperactivity Disorder and was on regular medication.
Table 1: Pre-scan beauty ratings (-5 = Ugly, 0 = Neut, 5 = Beau) for each equation by subject
Before scanning, each subject rated all 60 equations on a scale of -5 (Ugly) to +5 (Beau)
		Subject
	Equation	S01	S02	S03	S04	S05	S06	S07	S09	S10	S11	S12	S13	S14	S15	S16
	1	3	5	5	5	1	3	5	5	1	4	4	5	4	-1	5
	2	4	5	4	3	3	4	4	2	1	5	2	3	4	1	4
	3	0	5	2	4	-2	0	5	-1	4	4	0	-1	0	1	0
	4	-2	-1	-1	1	0	1	5	-3	3	5	0	2	-1	3	1
	5	3	2	3	3	2	5	4	4	0	2	3	3	4	3	4
	6	2	5	1	5	4	4	2	4	1	0	2	5	3	3	3
	7	-3	0	-1	3	-2	0	0	4	2	-2	-1	5	-1	2	4
	8	2	0	4	0	2	3	0	3	1	-5	1	5	2	2	4
	9	3	2	1	1	-2	2	1	1	0	-5	1	3	1	3	3
	10	-3	5	3	3	4	4	0	1	2	3	2	5	1	3	5
	11	0	0	-1	0	-4	0	-1	-2	1	0	0	4	0	4	1
	12	1	0	2	0	4	-1	-3	-3	0	0	0	5	2	3	-2
	13	-2	0	1	-2	5	5	2	4	0	3	-1	2	3	2	0
	14	-4	-5	-5	-5	-2	-2	-5	4	-2	5	1	-1	-4	-4	2
	15	-3	-2	-3	-3	2	0	-1	3	-5	-4	1	1	-3	-5	5
	16	4	5	4	1	4	3	0	0	3	5	2	1	3	1	1
	17	2	1	3	1	4	5	0	3	0	3	2	0	2	2	2
	18	1	3	4	2	5	5	1	5	5	4	-1	-2	2	3	5
	19	1	0	1	0	4	0	-1	-3	1	-3	1	4	2	4	-2
	20	4	3	4	2	4	1	0	2	2	1	0	3	3	5	0
	21	4	-5	2	0	-1	0	4	2	0	0	1	4	2	-3	2
	22	0	2	4	3	4	3	2	-1	3	0	2	2	4	-1	2
	23	2	1	2	0	3	4	0	-3	0	3	2	3	1	2	4
	24	0	0	0	1	3	1	4	1	0	2	2	3	3	-1	1
	25	4	5	0	1	-2	3	2	-1	-1	4	3	0	-1	1	3
	26	-3	-3	3	4	5	0	0	0	1	3	-1	5	0	4	-2
	27	2	-2	-1	4	-4	0	-2	5	2	0	-1	4	-1	3	0
	28	-3	3	0	0	-3	1	-3	3	-2	-5	-1	1	1	-5	-4
	29	2	-1	1	0	5	5	1	-4	3	2	-2	3	2	3	5
	30	-3	4	2	-1	-2	2	-3	5	1	4	-1	5	0	-3	1
	31	4	4	2	4	3	4	-1	5	0	4	1	3	1	2	4
	32	4	3	3	0	5	4	-1	3	0	-2	0	1	2	2	2
	33	2	-1	-2	-3	0	0	0	-4	1	0	-2	5	-1	3	-3
	34	0	0	3	5	5	5	2	3	2	5	-1	3	3	3	3
	35	-3	-1	1	1	2	1	-1	3	1	-2	-2	2	1	-3	0
	36	4	3	0	3	0	0	0	4	2	3	0	3	2	2	2
	37	0	1	-1	2	4	0	-1	0	4	1	1	1	-1	3	2
	38	-2	1	1	2	2	3	-1	-2	-2	2	-2	2	-2	3	3
	39	-4	0	3	0	-1	0	0	-1	0	0	1	0	1	-1	-4
	40	4	0	0	0	0	3	1	3	1	3	-2	-2	3	3	-5
	41	3	-5	-3	2	4	2	-4	-3	1	-5	2	3	0	2	4
	42	2	-5	-1	0	0	0	0	3	-1	3	0	-2	-1	3	0
	43	3	-4	-1	-1	3	4	2	4	1	-4	-1	5	2	1	5
	44	2	3	-3	0	0	0	0	5	3	2	3	-1	0	4	-1
	45	-3	0	-2	0	0	-2	0	-5	1	1	1	0	1	1	2
	46	4	2	-4	0	1	2	2	-4	2	5	-2	0	2	3	3
	47	-3	-1	0	-1	5	0	0	2	0	0	0	0	1	-1	4
	48	0	1	-3	-1	0	0	2	2	0	0	1	1	3	4	1
	49	2	3	2	2	4	-1	-3	1	2	0	0	1	1	2	3
	50	-3	3	3	0	1	0	0	0	0	-5	1	0	2	-3	-2
	51	-3	4	3	0	1	0	0	-3	-1	-5	2	0	2	-3	-5
	52	2	0	-2	2	4	5	3	-1	0	-1	2	2	3	4	0
	53	1	-1	0	0	3	0	-1	-4	3	-2	1	1	2	2	4
	54	2	5	4	2	5	4	2	4	3	0	2	2	3	4	5
	55	3	4	3	2	5	3	3	2	0	3	2	2	3	2	-4
	56	1	1	0	-1	4	2	0	1	-1	0	2	1	2	3	1
	57	-2	1	-1	-1	5	2	2	2	0	3	1	-1	0	3	1
	58	4	5	4	2	4	4	0	1	-1	4	3	4	3	3	4
	59	-3	-4	-4	-1	2	0	-4	4	1	2	-2	3	-2	2	2
	60	5	2	-1	-1	-1	4	2	5	2	5	-1	-1	2	3	-1
Table 2: Scan-time equation numbers (1 to 60) by subject, session and trial
Pre-scan beauty ratings (Table 1) were used to rank the equations individually for each subject into 20 "low", 20 "medium" and 20 "high" rated equations.
Four scanning sessions were carried out for each subject. Each scanning session had 19 trials; 5 "low", 5 "medium" and 5 "high" rated equations and 4 blank trials.
		Session 1 trials 1 to 19																			Session 2 trials 1 to 19																			Session 3 trials 1 to 19
	Trial	1:01	1:02	1:03	1:04	1:05	1:06	1:07	1:08	1:09	1:10	1:11	1:12	1:13	1:14	1:15	1:16	1:17	1:18	1:19	2:01	2:02	2:03	2:04	2:05	2:06	2:07	2:08	2:09	2:10	2:11	2:12	2:13	2:14	2:15	2:16	2:17	2:18	2:19	3:01	3:02	3:03	3:04	3:05	3:06	3:07	3:08	3:09	3:10
	Pre-scan	High	Medium	Low	High	Blank	Medium	Low	High	Blank	Low	Medium	Blank	Low	Medium	High	Blank	Medium	Low	High	High	Low	Medium	Blank	Low	Medium	Blank	Low	High	Medium	Low	High	Medium	Blank	High	Medium	High	Blank	Low	Low	Blank	Medium	Blank	Low	Medium	High	Low	High	Medium
Subject	S01	41	44	35	58		37	57	43		51	29		3	33	21		24	59	16	9	45	48		26	18		30	31	23	50	52	6		25	12	55		38	4		27		10	56	5	28	40	17
	S02	49	60	27	54		39	11	50		35	9		12	22	1		24	47	51	44	4	40		59	52		15	3	57	33	20	38		2	45	30		8	53		5		42	37	36	26	16	56
	S03	32	30	45	58		40	57	34		11	12		60	21	2		28	27	51	26	52	47		44	56		33	16	38	7	49	19		8	53	39		43	37		3		15	13	17	48	22	35
	S04	55	20	56	6		42	23	58		8	25		28	35	22		39	11	7	54	57	44		43	46		48	3	17	60	38	4		36	45	2		21	12		24		13	53	52	47	31	16
	S05	41	12	30	55		51	44	49		4	53		45	6	18		46	33	58	37	21	5		9	15		25	29	31	60	17	2		26	8	52		42	36		43		3	59	22	14	47	24
	S06	10	22	19	34		59	44	23		33	1		47	8	58		51	36	43	6	21	4		7	24		15	5	56	27	38	30		60	20	31		42	37		57		49	9	2	11	18	46
	S07	43	29	11	3		23	7	46		32	58		8	9	52		17	35	57	34	15	26		30	36		27	2	51	31	6	45		55	33	48		53	37		56		12	44	25	49	24	50
	S09	6	28	23	44		10	52	7		38	8		16	15	54		50	3	36	5	41	24		4	56		19	1	55	11	34	21		59	49	13		39	22		57		46	20	42	12	30	48
	S10	34	43	58	37		52	31	36		13	35		32	40	16		48	17	60	27	5	55		42	1		56	29	30	12	59	11		22	57	46		24	21		33		38	8	20	51	54	26
	S11	57	17	19	46		48	21	1		53	59		22	10	31		39	52	25	55	7	49		51	56		43	2	38	35	26	5		58	54	3		12	6		44		41	45	42	15	16	29
	S12	17	50	13	58		36	3	22		28	39		4	45	52		20	30	41	16	18	42		46	49		7	55	31	27	57	15		54	47	23		60	34		37		38	14	10	59	25	21
	S13	11	24	17	33		53	16	19		46	9		28	20	6		48	47	58	59	25	56		44	13		60	8	2	45	31	52		7	4	21		15	50		5		3	38	41	57	26	55
	S14	13	46	33	5		35	57	16		11	32		9	36	48		28	26	34	6	37	39		7	47		27	54	21	3	51	17		52	45	20		44	30		29		59	12	60	25	1	19
	S15	40	18	1	54		23	43	42		47	9		45	10	60		13	2	57	38	22	31		35	36		51	19	5	39	29	55		11	32	46		25	3		6		21	53	37	50	48	4
	S16	7	25	26	43		30	42	8		3	59		52	6	53		16	13	41	5	50	48		33	57		19	1	37	60	38	22		58	56	23		35	20		45		39	21	2	12	18	36
Table 3: Scan-time beauty ratings for each equation by subject (Ugly, Neut, Beau or #### = no response)
During scanning, each subject was asked to rate each equation as "Ugly", "Neut" or "Beau". This table shows the scan-time rating for each equation.
		Subject
	Equation	S01	S02	S03	S04	S05	S06	S07	S09	S10	S11	S12	S13	S14	S15	S16
	1	Beau	Beau	Beau	Beau	Beau	Beau	Beau	Beau	Neut	Beau	Beau	Beau	Beau	Neut	Beau
	2	Beau	Beau	Beau	Beau	Beau	Neut	Beau	Beau	Neut	Beau	Beau	Neut	Beau	Ugly	Beau
	3	####	Beau	Neut	Beau	Ugly	Neut	Beau	Neut	Beau	Beau	Ugly	Ugly	Neut	Neut	Neut
	4	Neut	Neut	Ugly	Beau	Beau	Ugly	Beau	Beau	Beau	Beau	Ugly	Neut	Ugly	Beau	Neut
	5	Beau	Beau	Beau	Beau	Beau	Beau	Beau	Beau	Neut	Beau	Beau	Beau	Beau	Ugly	Beau
	6	Beau	Beau	Neut	Beau	Beau	Beau	Beau	Beau	Neut	Ugly	Beau	Beau	Neut	Ugly	Beau
	7	Neut	Ugly	Ugly	Neut	Neut	Ugly	Ugly	Neut	Neut	Ugly	Neut	Beau	Ugly	Neut	Beau
	8	Beau	Neut	Beau	Beau	Beau	Beau	Neut	Beau	Neut	Neut	Neut	Beau	Neut	Beau	Beau
	9	Neut	Beau	Neut	Beau	Neut	Beau	Beau	Neut	Beau	Neut	Ugly	Neut	Beau	Ugly	Neut
	10	Neut	Beau	Beau	Beau	Beau	Beau	Neut	Beau	Beau	Beau	Beau	Beau	Beau	Ugly	Beau
	11	Ugly	Neut	Neut	Beau	Neut	Beau	Ugly	Neut	Neut	Neut	Beau	Beau	Neut	Beau	Neut
	12	Ugly	Neut	Neut	Neut	Beau	Ugly	Ugly	Neut	Neut	Ugly	Neut	Beau	Beau	Neut	Neut
	13	Ugly	Neut	Beau	Neut	Beau	Beau	Beau	Beau	Neut	Neut	Beau	Beau	Beau	Ugly	Beau
	14	Ugly	Ugly	Ugly	Ugly	Ugly	Ugly	Ugly	Beau	Ugly	Beau	Ugly	Ugly	Ugly	Ugly	Ugly
	15	Ugly	Ugly	Ugly	Ugly	Beau	Neut	Ugly	Beau	Ugly	Ugly	Neut	Neut	Ugly	Ugly	Neut
	16	Beau	Beau	Beau	Beau	Beau	Beau	Neut	Neut	Beau	Beau	Beau	Neut	Beau	Ugly	Beau
	17	Neut	Beau	Beau	Neut	Beau	Beau	Neut	Beau	Neut	Beau	Beau	Neut	Beau	Neut	Neut
	18	Neut	Beau	Beau	Beau	Beau	Beau	Beau	Beau	Beau	Beau	Ugly	Neut	Beau	Beau	Beau
	19	Beau	Neut	Neut	Neut	Beau	Ugly	Ugly	Ugly	Neut	Ugly	Neut	Beau	Neut	Beau	Beau
	20	Beau	Beau	####	Beau	Beau	Beau	Neut	Beau	Beau	Beau	Neut	Neut	Beau	Beau	Neut
	21	Ugly	Ugly	Beau	Neut	Neut	Neut	Beau	Neut	Neut	Beau	Ugly	Beau	Beau	Ugly	Beau
	22	Beau	Beau	Beau	Beau	Beau	Beau	Beau	Beau	Neut	Neut	Beau	Beau	Beau	Ugly	Neut
	23	Beau	Neut	Beau	Beau	Beau	Beau	Ugly	Neut	Neut	Beau	Beau	Beau	Beau	Beau	Beau
	24	Neut	Neut	Neut	Beau	Beau	Beau	Beau	Neut	Neut	Beau	Beau	Beau	Beau	Ugly	Neut
	25	Beau	Beau	Beau	Beau	Beau	Beau	Beau	Neut	Beau	Beau	Beau	Neut	Ugly	Ugly	Beau
	26	Neut	Beau	Beau	Beau	Neut	Neut	Neut	Neut	Ugly	Neut	Neut	Beau	Neut	Beau	Neut
	27	Beau	Neut	Ugly	Beau	Ugly	Neut	Ugly	Ugly	Beau	Neut	Neut	Neut	Ugly	Ugly	Beau
	28	Ugly	Beau	Neut	Neut	Neut	Neut	Neut	Beau	Ugly	Ugly	Neut	Neut	Neut	Ugly	Ugly
	29	Neut	Neut	Neut	Ugly	Beau	Beau	Neut	Ugly	Beau	Beau	Ugly	Neut	Ugly	Neut	Beau
	30	Ugly	Beau	Beau	Beau	Ugly	Neut	Ugly	Beau	Neut	Beau	Beau	Neut	Ugly	Ugly	Neut
	31	Ugly	Beau	Beau	Beau	Neut	Neut	Ugly	Beau	Beau	Beau	Beau	Beau	Neut	Ugly	Beau
	32	Neut	Beau	Beau	Beau	Beau	Beau	Neut	Beau	Neut	Neut	Neut	Neut	Beau	Neut	Beau
	33	Neut	Ugly	Ugly	Neut	Neut	Neut	Ugly	Beau	Beau	Ugly	Ugly	Beau	Neut	Beau	Neut
	34	Neut	Neut	Beau	Beau	Beau	Neut	Beau	Beau	Beau	Beau	Beau	Neut	Beau	Neut	Neut
	35	Neut	Ugly	Neut	Neut	Ugly	Neut	Neut	Neut	Ugly	Ugly	Neut	Neut	Neut	Ugly	Neut
	36	Beau	Beau	Neut	Beau	Neut	Neut	Neut	Beau	Beau	Neut	Neut	Neut	Neut	Neut	Neut
	37	Neut	Beau	Neut	Neut	Beau	Ugly	Neut	Neut	Beau	Ugly	Neut	Neut	Neut	Beau	Ugly
	38	Neut	Neut	Beau	Beau	Neut	Ugly	Ugly	Ugly	Ugly	Beau	Beau	Beau	Ugly	Ugly	Beau
	39	Ugly	Neut	Beau	Neut	Neut	Neut	Neut	Neut	Neut	Neut	Beau	Neut	Neut	Ugly	Ugly
	40	Beau	Neut	Ugly	Neut	Neut	Neut	Beau	Beau	Neut	Beau	Neut	Neut	Beau	Beau	Neut
	41	Neut	Ugly	Ugly	Beau	Beau	Neut	Ugly	Ugly	Ugly	Ugly	Neut	Neut	Neut	Ugly	Neut
	42	Beau	Ugly	Ugly	Neut	Ugly	Ugly	Neut	Neut	Neut	Neut	Ugly	Ugly	Ugly	Ugly	Neut
	43	Neut	Ugly	Ugly	Ugly	Neut	Beau	Beau	Beau	Neut	Neut	Ugly	Beau	Neut	Neut	Ugly
	44	Beau	Beau	Ugly	Neut	Neut	Ugly	Neut	Neut	Beau	Neut	Beau	Ugly	Ugly	Beau	Ugly
	45	Ugly	Neut	Neut	Neut	Ugly	Ugly	Neut	Ugly	Neut	Neut	Neut	Ugly	Neut	Beau	Ugly
	46	Beau	Beau	Ugly	Ugly	Neut	Beau	Beau	Ugly	Beau	Beau	Neut	Ugly	Beau	Beau	Ugly
	47	Neut	Ugly	Neut	Neut	Beau	Neut	Neut	Beau	Neut	Ugly	Ugly	Neut	Neut	Ugly	Beau
	48	Neut	Neut	Ugly	Neut	Neut	Neut	Beau	Ugly	Ugly	Neut	Beau	Ugly	Beau	Neut	Beau
	49	Ugly	Beau	Neut	Neut	Beau	Ugly	Ugly	Beau	Neut	Ugly	Beau	Neut	Ugly	Neut	Beau
	50	Ugly	Neut	Beau	Neut	Neut	Neut	Neut	Neut	Neut	Neut	Neut	Neut	Neut	Ugly	Ugly
	51	Ugly	Neut	Beau	Neut	Neut	Neut	Neut	Ugly	Ugly	Neut	Neut	Neut	Neut	Ugly	Ugly
	52	Neut	Neut	Ugly	Neut	Neut	Ugly	Beau	Ugly	Beau	Ugly	Neut	Beau	Beau	Neut	Beau
	53	Ugly	Neut	Beau	Neut	Neut	Neut	Neut	Ugly	Beau	Neut	Neut	Ugly	Neut	Ugly	Ugly
	54	Beau	Beau	Beau	Beau	Beau	Beau	Beau	Beau	Beau	Neut	Beau	Neut	Neut	Neut	Beau
	55	Ugly	Beau	Beau	Neut	Beau	Neut	Beau	Beau	Beau	Beau	Neut	Neut	Beau	Beau	Neut
	56	Neut	Neut	Neut	Neut	Beau	Neut	Neut	Neut	Ugly	Neut	Neut	Ugly	Ugly	Ugly	Ugly
	57	Neut	Neut	Neut	Neut	Beau	Beau	Ugly	Neut	Ugly	Beau	Neut	Ugly	Neut	Neut	Neut
	58	Beau	Beau	Beau	Beau	Beau	Neut	Neut	Beau	Neut	Beau	Neut	Neut	Neut	Neut	Beau
	59	Neut	Ugly	Ugly	Neut	Beau	Neut	Ugly	Beau	Ugly	Ugly	Neut	Ugly	Ugly	Ugly	Ugly
	60	Beau	Beau	Ugly	Ugly	Ugly	Beau	Beau	Beau	Beau	Beau	Neut	Neut	Beau	Beau	Neut
Table 4: Scan-time beauty ratings (Ugly, Neut, Beau, #### = no response) by subject, session and trial
This table shows the scan-time beauty ratings on a per-trial basis
		Session 1 trials 1 to 19																			Session 2 trials 1 to 19																			Session 3 trials 1 to 19
	Trial	1:01	1:02	1:03	1:04	1:05	1:06	1:07	1:08	1:09	1:10	1:11	1:12	1:13	1:14	1:15	1:16	1:17	1:18	1:19	2:01	2:02	2:03	2:04	2:05	2:06	2:07	2:08	2:09	2:10	2:11	2:12	2:13	2:14	2:15	2:16	2:17	2:18	2:19	3:01	3:02	3:03	3:04	3:05	3:06	3:07	3:08	3:09	3:10
	Pre-scan	High	Medium	Low	High	Blank	Medium	Low	High	Blank	Low	Medium	Blank	Low	Medium	High	Blank	Medium	Low	High	High	Low	Medium	Blank	Low	Medium	Blank	Low	High	Medium	Low	High	Medium	Blank	High	Medium	High	Blank	Low	Low	Blank	Medium	Blank	Low	Medium	High	Low	High	Medium
Subject	S01	Neut	Beau	Neut	Beau		Neut	Neut	Neut		Ugly	Neut		####	Neut	Ugly		Neut	Neut	Beau	Neut	Ugly	Neut		Neut	Neut		Ugly	Ugly	Beau	Ugly	Neut	Beau		Beau	Ugly	Ugly		Neut	Neut		Beau		Neut	Neut	Beau	Ugly	Beau	Neut
	S02	Beau	Beau	Neut	Beau		Neut	Neut	Neut		Ugly	Beau		Neut	Beau	Beau		Neut	Ugly	Neut	Beau	Neut	Neut		Ugly	Neut		Ugly	Beau	Neut	Ugly	Beau	Neut		Beau	Neut	Beau		Neut	Neut		Beau		Ugly	Beau	Beau	Beau	Beau	Neut
	S03	Beau	Beau	Neut	Beau		Ugly	Neut	Beau		Neut	Neut		Ugly	Beau	Beau		Neut	Ugly	Beau	Beau	Ugly	Neut		Ugly	Neut		Ugly	Beau	Beau	Ugly	Neut	Neut		Beau	Beau	Beau		Ugly	Neut		Neut		Ugly	Beau	Beau	Ugly	Beau	Neut
	S04	Neut	Beau	Neut	Beau		Neut	Beau	Beau		Beau	Beau		Neut	Neut	Beau		Neut	Beau	Neut	Beau	Neut	Neut		Ugly	Ugly		Neut	Beau	Neut	Ugly	Beau	Beau		Beau	Neut	Beau		Neut	Neut		Beau		Neut	Neut	Neut	Neut	Beau	Beau
	S05	Beau	Beau	Ugly	Beau		Neut	Neut	Beau		Beau	Neut		Ugly	Beau	Beau		Neut	Neut	Beau	Beau	Neut	Beau		Neut	Beau		Beau	Beau	Neut	Ugly	Beau	Beau		Neut	Beau	Neut		Ugly	Neut		Neut		Ugly	Beau	Beau	Ugly	Beau	Beau
	S06	Beau	Beau	Ugly	Neut		Neut	Ugly	Beau		Neut	Beau		Neut	Beau	Neut		Neut	Neut	Beau	Beau	Neut	Ugly		Ugly	Beau		Neut	Beau	Neut	Neut	Ugly	Neut		Beau	Beau	Neut		Ugly	Ugly		Beau		Ugly	Beau	Neut	Beau	Beau	Beau
	S07	Beau	Neut	Ugly	Beau		Ugly	Ugly	Beau		Neut	Neut		Neut	Beau	Beau		Neut	Neut	Ugly	Beau	Ugly	Neut		Ugly	Neut		Ugly	Beau	Neut	Ugly	Beau	Neut		Beau	Ugly	Beau		Neut	Neut		Neut		Ugly	Neut	Beau	Ugly	Beau	Neut
	S09	Beau	Beau	Neut	Neut		Beau	Ugly	Neut		Ugly	Beau		Neut	Beau	Beau		Neut	Neut	Beau	Beau	Ugly	Neut		Beau	Neut		Ugly	Beau	Beau	Neut	Beau	Neut		Beau	Beau	Beau		Neut	Beau		Neut		Ugly	Beau	Neut	Neut	Beau	Ugly
	S10	Beau	Neut	Neut	Beau		Beau	Beau	Beau		Neut	Ugly		Neut	Neut	Beau		Ugly	Neut	Beau	Beau	Neut	Beau		Neut	Neut		Ugly	Beau	Neut	Neut	Ugly	Neut		Neut	Ugly	Beau		Neut	Neut		Beau		Ugly	Neut	Beau	Ugly	Beau	Ugly
	S11	Beau	Beau	Ugly	Beau		Neut	Beau	Beau		Neut	Ugly		Neut	Beau	Beau		Neut	Ugly	Beau	Beau	Ugly	Ugly		Neut	Neut		Neut	Beau	Beau	Ugly	Neut	Beau		Beau	Neut	Beau		Ugly	Ugly		Neut		Ugly	Neut	Neut	Ugly	Beau	Beau
	S12	Beau	Neut	Beau	Neut		Neut	Ugly	Beau		Neut	Beau		Ugly	Neut	Neut		Neut	Beau	Neut	Beau	Ugly	Ugly		Neut	Beau		Neut	Neut	Beau	Neut	Neut	Neut		Beau	Ugly	Beau		Neut	Beau		Neut		Beau	Ugly	Beau	Neut	Beau	Ugly
	S13	Beau	Beau	Neut	Beau		Ugly	Neut	Beau		Ugly	Neut		Neut	Neut	Beau		Ugly	Neut	Neut	Ugly	Neut	Ugly		Ugly	Beau		Neut	Beau	Neut	Ugly	Beau	Beau		Beau	Neut	Beau		Neut	Neut		Beau		Ugly	Beau	Neut	Ugly	Beau	Neut
	S14	Beau	Beau	Neut	Beau		Neut	Neut	Beau		Neut	Beau		Beau	Neut	Beau		Neut	Neut	Beau	Neut	Neut	Neut		Ugly	Neut		Ugly	Neut	Beau	Neut	Neut	Beau		Beau	Neut	Beau		Ugly	Ugly		Ugly		Ugly	Beau	Beau	Ugly	Beau	Neut
	S15	Beau	Beau	Neut	Neut		Beau	Neut	Ugly		Ugly	Ugly		Beau	Ugly	Beau		Ugly	Ugly	Neut	Ugly	Ugly	Ugly		Ugly	Neut		Ugly	Beau	Ugly	Ugly	Neut	Beau		Beau	Neut	Beau		Ugly	Neut		Ugly		Ugly	Ugly	Beau	Ugly	Neut	Beau
	S16	Beau	Beau	Neut	Ugly		Neut	Neut	Beau		Neut	Ugly		Beau	Beau	Ugly		Beau	Beau	Neut	Beau	Ugly	Beau		Neut	Neut		Beau	Beau	Ugly	Neut	Beau	Neut		Beau	Ugly	Beau		Neut	Neut		Ugly		Ugly	Beau	Beau	Neut	Beau	Neut
Table 5: Scan-time responses by subject - Session and experiment totals
This table shows the proportions of "Ugly", "Neut" and "Beau" scan-time ratings summated separately for each session.
Separate panels show the minimum counts and total counts for "Ugly", "Neut" and "Beau" scan-time beauty ratings over all sessions.
		Session 1 beauty			Session 2 beauty			Session 3 beauty			Session 4 beauty				All sessions minimum counts					All sessions total counts
		Ugly	Neut	Beau	Ugly	Neut	Beau	Ugly	Neut	Beau	Ugly	Neut	Beau		Ugly	Neut	Beau			Ugly	Neut	Beau
Subject	S01	2	9	3	6	6	3	4	6	5	4	2	9		2	2	3			16	23	20
	S02	2	7	6	3	7	5	2	5	8	4	3	8		2	3	5			11	22	27
	S03	3	5	7	5	4	6	3	6	5	5	2	8		3	2	5			16	17	26
	S04	0	7	8	3	6	6	2	8	5	1	5	9		0	5	5			6	26	28
	S05	2	5	8	2	5	8	3	5	7	1	5	9		1	5	7			8	20	32
	S06	2	7	6	4	6	5	3	5	7	3	7	5		2	5	5			12	25	23
	S07	4	6	5	5	5	5	3	7	5	4	4	7		3	4	5			16	22	22
	S09	2	6	7	2	5	8	4	5	6	3	3	9		2	3	6			11	19	30
	S10	2	6	7	3	8	4	4	5	6	3	7	5		2	5	4			12	26	22
	S11	3	4	8	4	5	6	5	5	5	2	6	7		2	4	5			14	20	26
	S12	2	8	5	3	7	5	4	4	7	2	8	5		2	4	5			11	27	22
	S13	3	7	5	4	5	6	2	8	5	2	9	4		2	5	4			11	29	20
	S14	0	7	8	3	8	4	6	4	5	5	4	6		0	4	4			14	23	23
	S15	6	4	5	8	3	4	5	6	4	9	3	3		5	3	3			28	16	16
	S16	3	5	7	3	5	7	3	7	5	4	5	6		3	5	5			13	22	25
																			All subj.	199	337	362
Table 6: Post-scan understanding ratings (0 to 3) by subject
After scanning, each subject rated their understanding of all 60 equations on a scale of 0 (no comprehension) to 3 (profound comprehension)
		Subject
	Equation	S01	S02	S03	S04	S05	S06	S07	S09	S10	S11	S12	S13	S14	S15	S16
	1	3	3	3	2	2	3	3	3	3	3	3	3	3	3	3
	2	3	3	3	3	3	3	3	3	3	3	3	3	3	3	3
	3	2	3	1	2	2	3	2	3	2	3	2	3	2	2	2
	4	1	0	0	2	1	1	1	2	3	3	0	1	1	1	1
	5	3	3	3	3	2	3	3	3	3	3	3	3	3	2	3
	6	3	2	2	3	3	2	3	3	3	3	3	3	3	2	3
	7	0	1	0	1	1	1	0	1	0	1	1	3	2	0	3
	8	3	3	3	3	3	3	2	3	3	3	3	3	3	3	3
	9	3	2	2	3	2	2	3	3	3	3	2	2	2	1	2
	10	1	3	1	3	3	3	1	3	3	3	3	3	1	3	3
	11	1	2	0	3	1	2	1	2	1	0	2	2	1	3	3
	12	2	2	1	2	1	1	0	3	2	0	2	2	1	0	1
	13	3	3	2	2	3	3	3	3	3	3	3	3	2	1	3
	14	0	1	2	1	1	2	1	2	0	1	2	2	2	2	3
	15	0	2	2	2	1	3	2	3	2	2	2	2	3	2	3
	16	3	3	3	3	3	3	3	3	3	3	3	3	3	3	3
	17	2	3	2	2	3	3	2	3	3	2	3	3	3	3	3
	18	2	3	2	2	3	3	2	3	3	2	1	1	2	2	3
	19	3	1	3	1	2	1	1	2	2	2	3	2	2	3	3
	20	3	3	3	3	3	3	2	2	3	2	2	2	2	2	3
	21	3	3	3	3	3	2	3	3	3	3	3	2	3	1	3
	22	3	3	3	3	3	3	3	3	3	3	3	3	3	3	3
	23	3	3	3	3	3	3	2	3	3	3	3	2	3	2	3
	24	3	2	2	3	3	3	3	3	3	3	3	3	3	2	3
	25	3	3	2	3	3	3	3	3	3	3	2	3	2	3	3
	26	0	1	1	2	1	1	0	1	0	2	1	3	1	1	3
	27	0	1	0	2	1	2	0	2	1	1	1	3	1	1	2
	28	3	3	3	3	3	3	3	3	3	3	3	3	3	3	3
	29	2	2	2	2	2	3	2	3	3	2	1	2	2	1	3
	30	0	3	2	1	1	3	1	3	1	2	2	3	2	1	3
	31	0	2	2	2	1	2	1	3	1	2	1	3	2	2	3
	32	3	2	3	3	3	3	3	3	3	3	2	3	3	3	3
	33	0	0	0	0	0	1	0	1	3	0	0	3	0	2	1
	34	1	0	0	3	2	2	1	3	3	2	2	1	2	2	2
	35	0	0	1	2	1	1	1	1	2	1	1	1	2	1	3
	36	3	1	0	3	0	1	0	2	2	1	1	2	2	2	2
	37	0	1	1	1	0	1	0	1	1	1	1	3	2	0	2
	38	0	2	2	2	1	2	1	2	1	1	2	2	2	1	3
	39	3	3	2	3	3	2	2	3	2	0	2	2	3	3	3
	40	2	0	0	1	0	2	1	2	1	1	2	0	1	0	1
	41	2	1	1	2	2	2	0	1	2	1	2	2	2	0	3
	42	0	0	0	0	0	1	0	0	0	1	2	0	1	0	3
	43	2	1	1	2	1	2	1	2	1	2	2	2	2	1	3
	44	1	0	0	1	0	1	0	3	3	1	3	0	1	3	1
	45	1	0	0	1	0	0	0	3	3	0	0	0	0	1	1
	46	3	1	0	0	0	2	2	2	2	2	0	0	2	0	2
	47	1	1	1	2	2	2	1	2	2	2	2	2	1	0	3
	48	1	0	0	0	0	1	2	1	0	2	2	0	2	0	2
	49	0	2	1	1	1	1	0	1	0	1	1	3	2	1	3
	50	2	3	2	3	3	3	3	3	3	1	2	2	3	3	3
	51	2	3	2	3	2	2	1	3	1	1	2	2	2	3	3
	52	2	1	0	2	0	3	2	1	3	1	2	1	3	1	2
	53	0	0	1	0	0	2	0	1	2	0	1	1	1	0	2
	54	2	2	2	2	3	3	3	3	3	2	1	2	2	3	3
	55	2	3	3	2	3	3	2	3	3	2	2	0	2	3	3
	56	0	1	2	1	0	1	0	1	0	0	1	1	2	2	2
	57	1	2	1	1	1	2	1	2	3	2	0	1	2	2	3
	58	2	2	2	2	2	1	2	1	2	2	2	2	3	2	3
	59	0	0	0	1	2	1	0	1	1	1	0	2	2	0	1
	60	3	1	0	0	0	2	3	3	2	3	2	0	2	0	2
Table 7: Post-scan understanding ratings (0-3) by subject, session and trial
This table shows the scan-time beauty ratings on a per-trial basis
		Session 1 trials 1 to 19																			Session 2 trials 1 to 19																			Session 3 trials 1 to 19
	Trial	1:01	1:02	1:03	1:04	1:05	1:06	1:07	1:08	1:09	1:10	1:11	1:12	1:13	1:14	1:15	1:16	1:17	1:18	1:19	2:01	2:02	2:03	2:04	2:05	2:06	2:07	2:08	2:09	2:10	2:11	2:12	2:13	2:14	2:15	2:16	2:17	2:18	2:19	3:01	3:02	3:03	3:04	3:05	3:06	3:07	3:08	3:09	3:10
Subject	S01	2	1	0	2		0	1	2		2	2		2	0	3		3	0	3	3	1	1		0	2		0	0	3	2	2	3		3	2	2		0	1		0		1	0	3	3	2	2
	S02	2	1	1	2		3	2	3		0	2		2	3	3		2	1	3	0	0	0		0	1		2	3	2	0	3	2		3	0	3		3	0		3		0	1	1	1	3	1
	S03	3	2	0	2		0	1	0		0	1		0	3	3		3	0	2	1	0	1		0	2		0	3	2	0	1	3		3	1	2		1	1		1		2	2	2	0	3	1
	S04	2	3	1	3		0	3	2		3	3		3	2	3		3	3	1	2	1	1		2	0		0	2	2	0	2	2		3	1	3		3	2		3		2	0	2	2	2	3
	S05	2	1	1	3		2	0	1		1	0		0	3	3		0	0	2	0	3	2		2	1		3	2	1	0	3	3		1	3	0		0	0		1		2	2	3	1	2	3
	S06	3	3	1	2		1	1	3		1	3		2	3	1		2	1	2	2	2	1		1	3		3	3	1	2	2	3		2	3	2		1	1		2		1	2	3	2	3	2
	S07	1	2	1	2		2	0	2		3	2		2	3	2		2	1	1	1	2	0		1	0		0	3	1	1	3	0		2	0	2		0	0		0		0	0	3	0	3	3
	S09	3	3	3	3		3	1	1		2	3		3	3	3		3	3	2	3	1	3		2	1		2	3	3	2	3	3		1	1	3		3	3		2		2	2	0	3	3	1
	S10	3	1	2	1		3	1	2		3	2		3	1	3		0	3	2	1	3	3		0	3		0	3	1	2	1	1		3	3	2		3	3		3		1	3	3	1	3	0
	S11	2	2	2	2		2	3	3		0	1		3	3	2		0	1	3	2	1	1		1	0		2	3	1	1	2	3		2	2	3		0	3		1		1	0	1	2	3	2
	S12	3	2	3	2		1	2	3		3	2		0	0	2		2	2	2	3	1	2		0	1		1	2	1	1	0	2		1	2	3		2	2		1		2	2	3	0	2	3
	S13	2	3	3	3		1	3	2		0	2		3	2	3		0	2	2	2	3	1		0	3		0	3	3	0	3	1		3	1	2		2	2		3		3	2	2	1	3	0
	S14	2	2	0	3		2	2	3		1	3		2	2	2		3	1	2	3	2	3		2	1		1	2	3	2	2	3		3	0	2		1	2		2		2	1	2	2	3	2
	S15	0	2	3	3		2	1	0		0	1		1	3	0		1	3	2	1	3	2		1	2		3	3	2	3	1	3		3	3	0		3	2		2		1	0	0	3	0	1
	S16	3	3	3	3		3	3	3		2	1		2	3	2		3	3	3	3	3	2		1	3		3	3	2	2	3	3		3	2	3		3	3		1		3	3	3	1	3	2
Table 8: Post-scan understanding ratings by subject - Session and experiment totals
This table shows the proportions of "0", "1", "2" & "3" post-scan understanding ratings summated separately for each session.
Separate panels show the minimum counts and total counts for post-scan understanding ratings over all sessions.
		Session 1 understanding				Session 2 understanding				Session 3 understanding				Session 4 understanding					All sessions minimum counts						All sessions total counts
		0	1	2	3	0	1	2	3	0	1	2	3	0	1	2	3		0	1	2	3			0	1	2	3
Subject	S01	4	2	6	3	4	2	5	4	3	4	2	6	5	1	1	8		3	1	1	3			16	9	14	21
	S02	1	3	6	5	6	1	3	5	3	4	2	6	1	6	3	5		1	1	2	5			11	14	14	21
	S03	6	2	3	4	4	5	3	3	3	4	6	2	3	1	7	4		3	1	3	2			16	12	19	13
	S04	1	2	3	9	3	3	6	3	1	2	9	3	1	5	3	6		1	2	3	3			6	12	21	21
	S05	5	4	3	3	4	3	3	5	2	4	4	5	2	4	2	7		2	3	2	3			13	15	12	20
	S06	0	6	4	5	0	4	6	5	1	4	5	5	0	2	4	9		0	2	4	5			1	16	19	24
	S07	1	4	8	2	6	4	3	2	7	1	1	6	1	6	2	6		1	1	1	2			15	15	14	16
	S09	0	2	2	11	0	4	3	8	1	2	5	7	0	5	3	7		0	2	2	7			1	13	13	33
	S10	1	4	4	6	2	4	2	7	2	2	2	9	2	0	5	8		1	0	2	6			7	10	13	30
	S11	2	2	6	5	2	5	5	3	1	7	3	4	2	2	4	7		1	2	3	3			7	16	18	19
	S12	2	1	8	4	2	6	5	2	2	2	7	4	0	4	5	6		0	1	5	2			6	13	25	16
	S13	2	1	6	6	3	3	3	6	2	2	5	6	1	2	7	5		1	1	3	5			8	8	21	23
	S14	1	2	8	4	1	3	6	5	0	2	9	4	0	4	6	5		0	2	6	4			2	11	29	18
	S15	4	4	3	4	1	3	3	8	4	4	3	4	3	3	7	2		1	3	3	2			12	14	16	18
	S16	0	1	3	11	0	1	4	10	0	3	1	11	0	2	4	9		0	1	1	9			0	7	12	41
																								All subj.	121	185	260	334
[truncated: 29 more columns]
